# Supplementary material for: Extraction of bioactives from brown seaweed using sub and supercritical fluids: Influence of the extract on the storage stability of fish oil enrich mayonnaise
Source: Frontiers journal article supplement (doi:10.3389/frfst.2022.1082490), 2023-01-06
Supplement: Table_1.DOCX [file Table_1.DOCX]

Supplementary Material

# Supplementary Table

# Table S1. Beta and gamma tocopherol content of the different mayonnaise during different storage days (day 0 to 28), including the relative tocopherol consumption during storage (RC%)

|  | Storage Day | | | | | |  |
| --- | --- | --- | --- | --- | --- | --- | --- |
| Sample | 0 | 3 | 7 | 14 | 21 | 28 | RC%§ |
|  | Beta-tocopherol (µg/g oil) | | | | | |  |
| Control | 49.3±0.1abcdef | 53.2±0.3a | 42.8±2.8defg | 51.9±0.5ab | 49.4±0.3abcdef | 49.5±1.1abcde | 0.5 |
| EDTA | 50.0±0.6abcde | 50.9±4.6abc | 39.0±3.6g | 51.7±0.1ab | 53.7±0.1a | 53.1± 0.5a | 65.2 |
| SCWE | 50.1±0.1abcde | 51.6±1.2ab | 38.8±1.1g | 52.5±0.2ab | 52.7±2.1a | 55.1±0.5a | 9.9 |
| SCCO2E | 53.2±0.4a | 51.4±0.7ab | 43.2±1.2cdefg | 44.8±0.1bcdefg | 51.4±0.5ab | 51.5±0.2ab | -3.2 |
| SCWER | 50.4±0.7abcd | 53.0±1.36a | 47.5±3.8abcdef | 51.9±0.1ab | 54.3±3.2a | 49.3±0.8abcdef | -2.2 |
| SCWER+ SCCO2E | 52.3±2.2ab | 50.9±3.7abc | 41.6±0.8fg | 42.5±0.0efg | 52.8±0.2a | 51.1±3.1ab | -2.5 |
|  | Gamma-tocopherol (µg/g oil) | | | | | |  |
| Control | 265±3.1abc | 280±5.9a | 264±17.5 abc | 277±2.9abc | 274±2.3abc | 269±2.1abc | 1.7 |
| EDTA | 268±3.9 abc | 2623±21.7 abc | 234±21.6c | 275±1.4abc | 293±0.7a | 291±6.3a | 8.5 |
| SCWE | 269±0.4abc | 271±13.2abc | 234±6.9bc | 278±0.5abc | 289±10.3a | 293±11.7a | 9.1 |
| SCCO2E | 263±1.2abc | 264±1.8abc | 279±0.9ab | 272±1.0abc | 284±3.5a | 276±2.4abc | 4.9 |
| SCWER | 271±4.0abc | 281±16.1a | 291±23.9a | 283±0.6a | 299±17.0a | 268±5.9abc | -1.1 |
| SCWER+ SCCO2E | 267±2.9abc | 264±24.6abc | 256±1.7abc | 283±4.0a | 294±6.3a | 276±1.1abc | 3.3 |
